# Supplementary material
Source: Springer Nature journal article supplement (https://www.springermedizin.de/resource/supplementary/12889_2013_5987_MOESM6_ESM.pdf/9494084)
Supplement: MOESM6 [file 9494084]

**Office environment: interactions at work and adequacy of space****1. How often did you interact with others at work in the ways described below? Please estimate the frequency and average duration of:**

*Formal meetings:* pre-scheduled meetings with colleagues and external parties, including telephone and video conferences.

*Informal discussions:* ad hoc meeting or conversation (not necessarily related to work) taking place away from your desk (e.g., in work space, lounge, printer/copier area, corridor, kitchen, tea room).

*Collaborative working:* working together with colleagues over something while sharing the same space.

Please do NOT include having lunch with others in the above categories.

|                              | Times in last 7 days | Average duration (min) |
|------------------------------|----------------------|------------------------|
| <i>Formal meetings</i>       |                      |                        |
| <i>Informal discussions</i>  |                      |                        |
| <i>Collaborative working</i> |                      |                        |

**2. Below are questions about spaces for formal meetings, informal discussion and collaborative working.**

For each of the questions below, please choose the response that best applies to your workplace. When considering informal discussion spaces, please think about spaces away from your desk. Please note that "functionally adequate" refers to quality aspects (e.g., equipment, furnishing, lighting, comfort, etc).

|                                                                                                    | Strongly disagree        | Disagree                 | Neither disagree nor agree | Agree                    | Strongly agree           | NA                       |
|----------------------------------------------------------------------------------------------------|--------------------------|--------------------------|----------------------------|--------------------------|--------------------------|--------------------------|
| There is a sufficient amount of space for formal meetings in my workplace.                         | <input type="checkbox"/> | <input type="checkbox"/> | <input type="checkbox"/>   | <input type="checkbox"/> | <input type="checkbox"/> | <input type="checkbox"/> |
| The space for formal meetings is functionally adequate. (Select NA if no such space exists.)       | <input type="checkbox"/> | <input type="checkbox"/> | <input type="checkbox"/>   | <input type="checkbox"/> | <input type="checkbox"/> | <input type="checkbox"/> |
| There is a sufficient amount of space for informal discussion in my workplace.                     | <input type="checkbox"/> | <input type="checkbox"/> | <input type="checkbox"/>   | <input type="checkbox"/> | <input type="checkbox"/> | <input type="checkbox"/> |
| The space for informal discussion is functionally adequate. (Select NA if no such space exists.)   | <input type="checkbox"/> | <input type="checkbox"/> | <input type="checkbox"/>   | <input type="checkbox"/> | <input type="checkbox"/> | <input type="checkbox"/> |
| There is a sufficient amount of space for collaborative working in my workplace.                   | <input type="checkbox"/> | <input type="checkbox"/> | <input type="checkbox"/>   | <input type="checkbox"/> | <input type="checkbox"/> | <input type="checkbox"/> |
| The space for collaborative working is functionally adequate. (Select NA if no such space exists.) | <input type="checkbox"/> | <input type="checkbox"/> | <input type="checkbox"/>   | <input type="checkbox"/> | <input type="checkbox"/> | <input type="checkbox"/> |

*The above materials have been developed for use within the Stand Up Victoria study. Any future use of these materials must be referenced to this article.*
